# Supplementary material
Source: HighWire-hosted journal article supplement (https://tobaccocontrol.bmj.com/highwire/filestream/165044/field_highwire_adjunct_files/1/tc-2022-057577supp002_data_supplement.pdf)
Supplement: tc-2022-057577supp002_data_supplement.pdf [file tc-2022-057577supp002_data_supplement.pdf]

Very Low Nicotine Cigarette Message Experiment

## **APPENDIX B**

### **Characteristics of Choice-Indifferent Participants**

For each DCE task, participants were categorized as “choice indifferent” if they indicated there was no difference between messages in all choice sets they evaluated within that task. Table B1 displays the number of choice indifferent participants for each task as well as demographic characteristics associated with choice indifference (as compared to the analytic sample). For the behavioral motivation (to try) task, women were more likely to be choice indifferent than men. For the harm task and behavioral motivation (to quit) task, no characteristics were associated with choice indifference. For the attitude task, choice indifference was associated with being older, having lower educational attainment, and user group status, with dual users more likely to express choice indifference and young adult non-smokers less likely to do so.

## Very Low Nicotine Cigarette Message Experiment

Table B1. Demographic Characteristics Associated with Choice Indifference for Each Task

| Characteristic         | DCE Task                                |                                      |                 |                                   |                                      |                 |                                   |                                      |                 |                                   |                                      |                 |
|------------------------|-----------------------------------------|--------------------------------------|-----------------|-----------------------------------|--------------------------------------|-----------------|-----------------------------------|--------------------------------------|-----------------|-----------------------------------|--------------------------------------|-----------------|
|                        | Attitude Toward Reduced Nicotine Policy |                                      |                 | Perceived Harm of VLNCs           |                                      |                 | Behavioral Motivation (to try)    |                                      |                 | Behavioral Motivation (to quit)   |                                      |                 |
|                        | Analytic Sample<br><i>n</i> = 765       | Choice Indifferent<br><i>n</i> = 362 | <i>p</i> -value | Analytic Sample<br><i>n</i> = 727 | Choice Indifferent<br><i>n</i> = 426 | <i>p</i> -value | Analytic Sample<br><i>n</i> = 297 | Choice Indifferent<br><i>n</i> = 218 | <i>p</i> -value | Analytic Sample<br><i>n</i> = 372 | Choice Indifferent<br><i>n</i> = 262 | <i>p</i> -value |
| Age (Years)            | 42.5 (17.8)                             | 45.6 (16.7)                          | .036            | 44.0 (17.4)                       | 44.4 (17.9)                          | .792            | 41.2 (19.8)                       | 44.1 (20.8)                          | .220            | 45.9 (14.3)                       | 45.3 (15.3)                          | .759            |
| Sex                    |                                         |                                      | .587            |                                   |                                      | .246            |                                   |                                      | .007            |                                   |                                      | .277            |
| Male                   | 55%                                     | 52%                                  |                 | 53%                               | 48%                                  |                 | 62%                               | 45%                                  |                 | 52%                               | 45%                                  |                 |
| Female                 | 45%                                     | 48%                                  |                 | 47%                               | 52%                                  |                 | 38%                               | 55%                                  |                 | 48%                               | 55%                                  |                 |
| Ethnicity              |                                         |                                      | .294            |                                   |                                      | .418            |                                   |                                      | .941            |                                   |                                      | .661            |
| White (non-Hispanic)   | 68%                                     | 77%                                  |                 | 74%                               | 68%                                  |                 | 63%                               | 66%                                  |                 | 72%                               | 74%                                  |                 |
| Black (non-Hispanic)   | 11%                                     | 8%                                   |                 | 9%                                | 10%                                  |                 | 11%                               | 10%                                  |                 | 14%                               | 9%                                   |                 |
| Hispanic               | 13%                                     | 9%                                   |                 | 12%                               | 15%                                  |                 | 18%                               | 17%                                  |                 | 10%                               | 12%                                  |                 |
| Other                  | 8%                                      | 6%                                   |                 | 5%                                | 7%                                   |                 | 8%                                | 6%                                   |                 | 5%                                | 5%                                   |                 |
| Education              |                                         |                                      | .027            |                                   |                                      | .112            |                                   |                                      | .271            |                                   |                                      | .981            |
| <High School           | 9%                                      | 15%                                  |                 | 8%                                | 13%                                  |                 | 11%                               | 8%                                   |                 | 8%                                | 9%                                   |                 |
| High School            | 33%                                     | 32%                                  |                 | 29%                               | 32%                                  |                 | 28%                               | 32%                                  |                 | 39%                               | 39%                                  |                 |
| Some College           | 37%                                     | 40%                                  |                 | 38%                               | 37%                                  |                 | 34%                               | 40%                                  |                 | 40%                               | 38%                                  |                 |
| Bachelor's+            | 20%                                     | 13%                                  |                 | 24%                               | 18%                                  |                 | 27%                               | 20%                                  |                 | 14%                               | 14%                                  |                 |
| User Group             |                                         |                                      | .001            |                                   |                                      | .342            |                                   |                                      | .810            |                                   |                                      | .142            |
| Exclusive Smoker       | 33%                                     | 34%                                  |                 | 35%                               | 31%                                  |                 | 58%                               | 60%                                  |                 | 64%                               | 54%                                  |                 |
| Dual User              | 17%                                     | 30%                                  |                 | 19%                               | 26%                                  |                 | 42%                               | 40%                                  |                 | 36%                               | 46%                                  |                 |
| Former Smoker          | 24%                                     | 24%                                  |                 | 25%                               | 25%                                  |                 | .                                 | .                                    |                 | .                                 | .                                    |                 |
| Young Adult Non-Smoker | 26%                                     | 12%                                  |                 | 21%                               | 17%                                  |                 | .                                 | .                                    |                 | .                                 | .                                    |                 |

Note: Survey weights were used for all estimates. *p* values reflect omnibus significance tests ( $\chi^2$  or ANOVA as applicable).
